# Supplementary material
Source: PubMed Central journal article supplement (PMC4564679)
Supplement: mmc1.pdf [file mmc1.pdf]

## **SUPPLEMENTAL INFORMATION**

### Quantitative analysis of intracellular fluorescent foci in live bacteria

M. Charl Moolman<sup>‡1</sup>, Jacob W.J. Kerssemakers<sup>‡1</sup> and Nynke H. Dekker<sup>1,\*</sup>

July 10, 2015

<sup>1</sup>Department of Bionanoscience, Kavli Institute of Nanoscience, Faculty of Applied Sciences,  
Delft University of Technology, Lorentzweg 1, 2628 CJ Delft, The Netherlands

<sup>‡</sup>These authors contributed equally to this work.

\*Corresponding author

## 1 SUPPLEMENTARY FIGURES

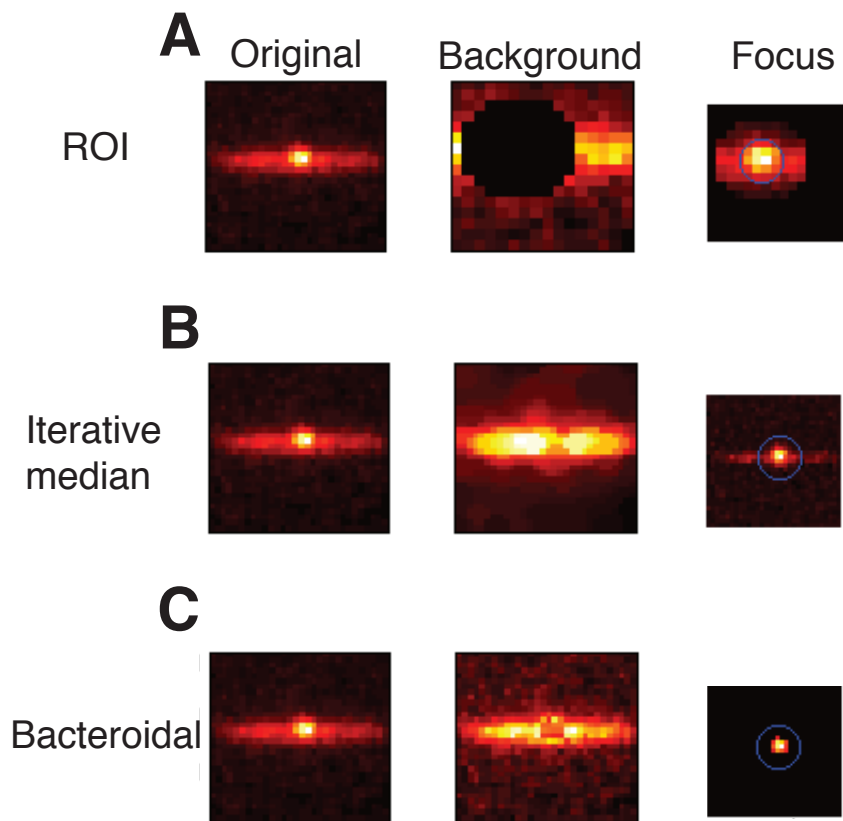

Supplementary Figure S1: Example results of using the three different background subtraction algorithms on the same image (A) Region of interest algorithm, (B) Iterative median algorithm, and (C) The bacteroidal algorithm.

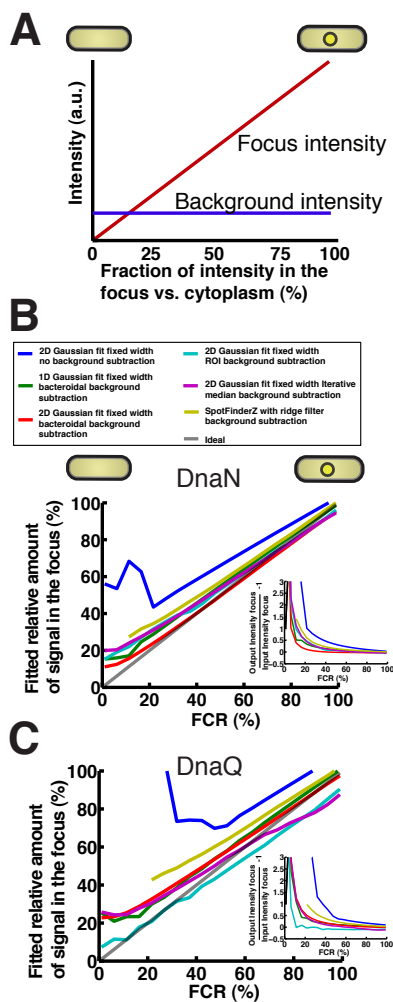

**Supplementary Figure S2: Comparison of the different algorithms for determining the total intensity of a focus using the incremental focus approach.** (A) Schematic of approach. (B-C) The ratio of the amount of signal in the focus as estimated utilizing the different algorithms versus the known total cellular signal plotted of for the two different strains DnaN (A) and DnaQ (B) respectively. Here we plot the estimated focus content divided by the known total signal. (inset) The resulting error in terms of the difference between the focus content from the fit and the known focus content divided by the known focus content as function of FCR. We only show the fitted results up and until 100%. ( $n = 42$  cells)
